# Supplementary material for: Intravenous tenecteplase compared with alteplase for minor ischaemic stroke: a secondary analysis of the AcT randomised clinical trial
Source: HighWire-hosted journal article supplement (doi:10.1136/svn-2023-002828), 2024-01-31
Supplement: svn-2023-002828supp002_data_supplement.pdf [file svn-2023-002828supp002_data_supplement.pdf]

**Supplement 2**

- eFigure 1. Participant flow diagram
- eFigure 2. Comparison of hemorrhage grades as per Heidelberg Bleeding Classification between groups
- eFigure 3. Kaplan-Meier curve showing time to death compared between groups.
- eTable 1. Comparison of NIHSS scores between groups

eFigure 1. Participant flow diagram

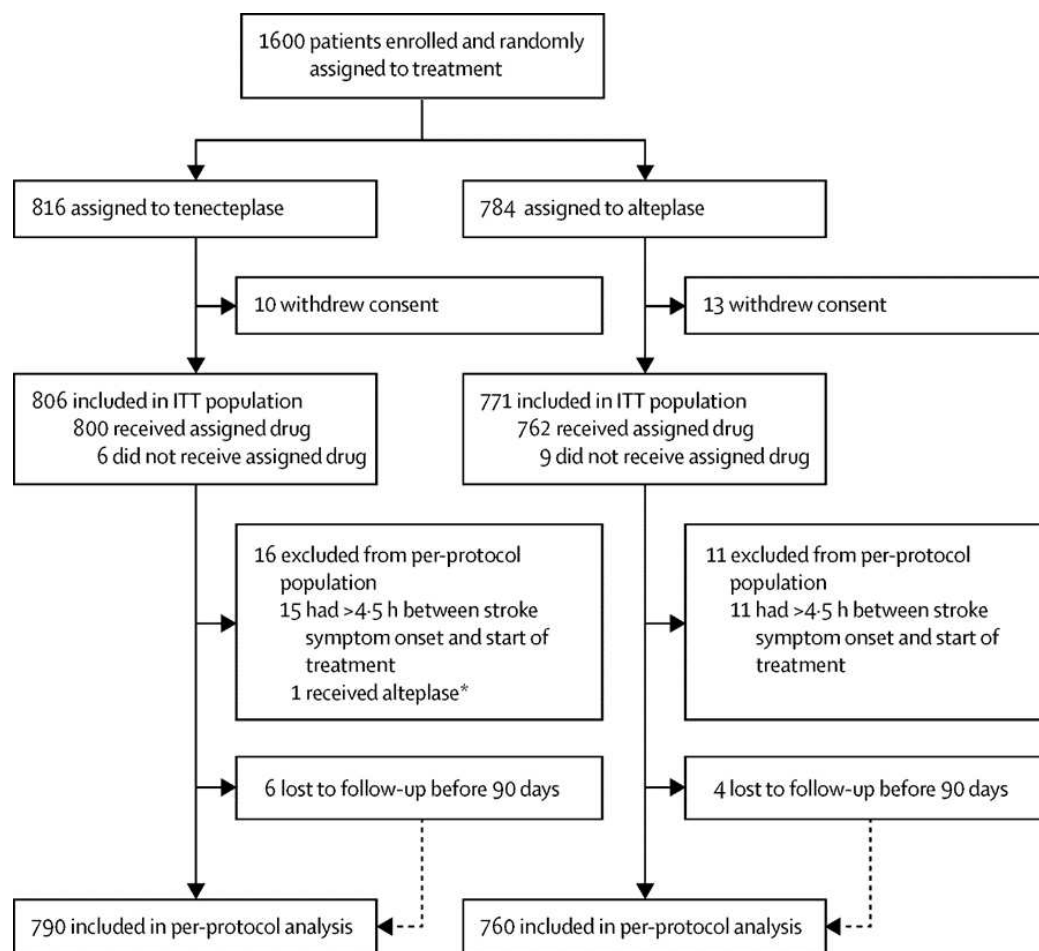

ITT=intention-to-treat. \*The one patient who crossed over and received alteplase instead of tenecteplase were included in the alteplase group for safety analysis.

eFigure 2. Comparison of hemorrhage grades as per Heidelberg Bleeding Classification between alteplase and tenecteplase in minor stroke (NIHSS ≤ 5).

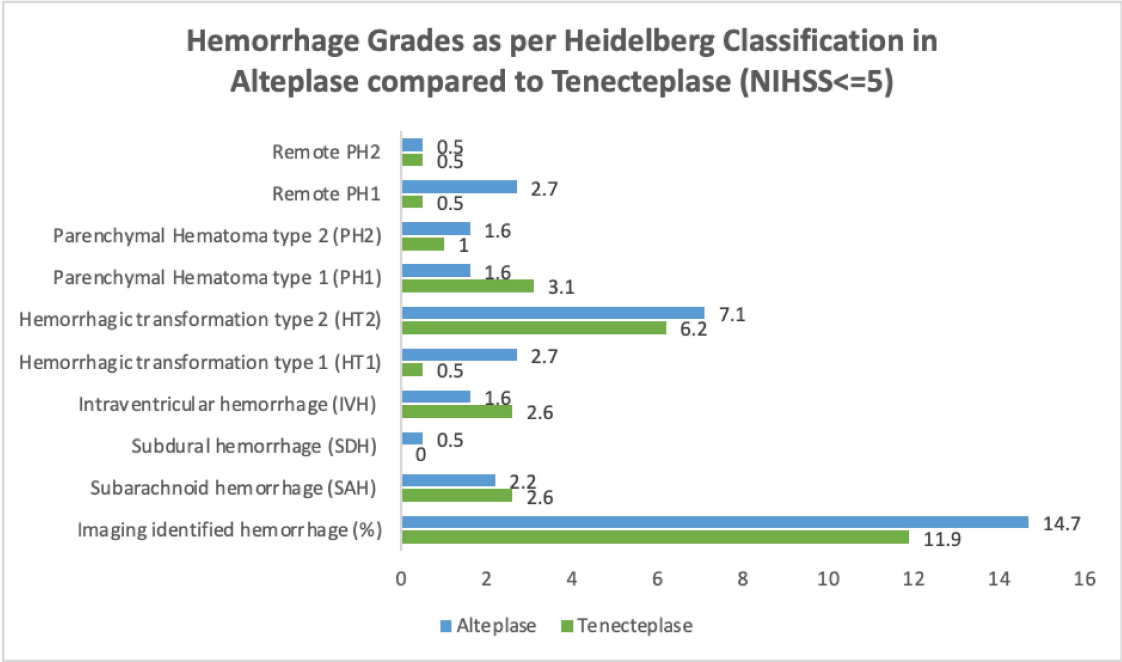

eFigure 3. Kaplan-Meier curve showing time to death in alteplase vs tenecteplase group.

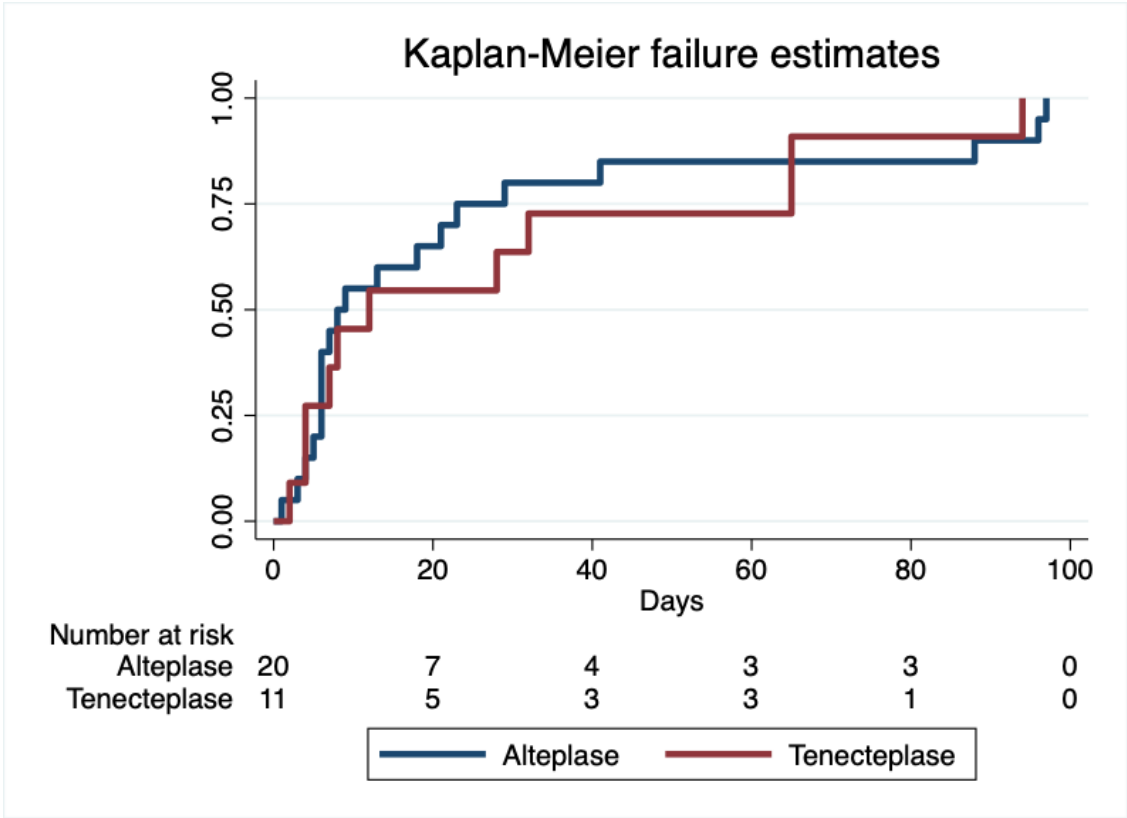

eTable 1. Comparison of NIHSS scores between groups

|                    |              |               |
|--------------------|--------------|---------------|
| Alteplase group    |              |               |
| NIHSS              | n (%)        | mRS 0-1,<br>n |
| 0                  | 2 (1.1)      | 0             |
| 1                  | 8 (4.4)      | 5             |
| 2                  | 14 (7.6)     | 6             |
| 3                  | 41<br>(22.3) | 19            |
| 4                  | 57<br>(31.0) | 28            |
| 5                  | 62<br>(33.7) | 28            |
| Tenecteplase group |              |               |
| NIHSS              | n (%)        | mRS 0-1,<br>n |
| 0                  | 8 (4.1)      | 5             |
| 1                  | 7 (3.6)      | 3             |
| 2                  | 25<br>(12.9) | 11            |
| 3                  | 47<br>(24.2) | 25            |
| 4                  | 45<br>(23.2) | 23            |
| 5                  | 62<br>(32.0) | 33            |
